# Supplementary material
Source: MDPI journal article supplement (https://www.mdpi.com/2079-6412/8/9/318)
Supplement: s1 [file s1]

## Supplementary Materials

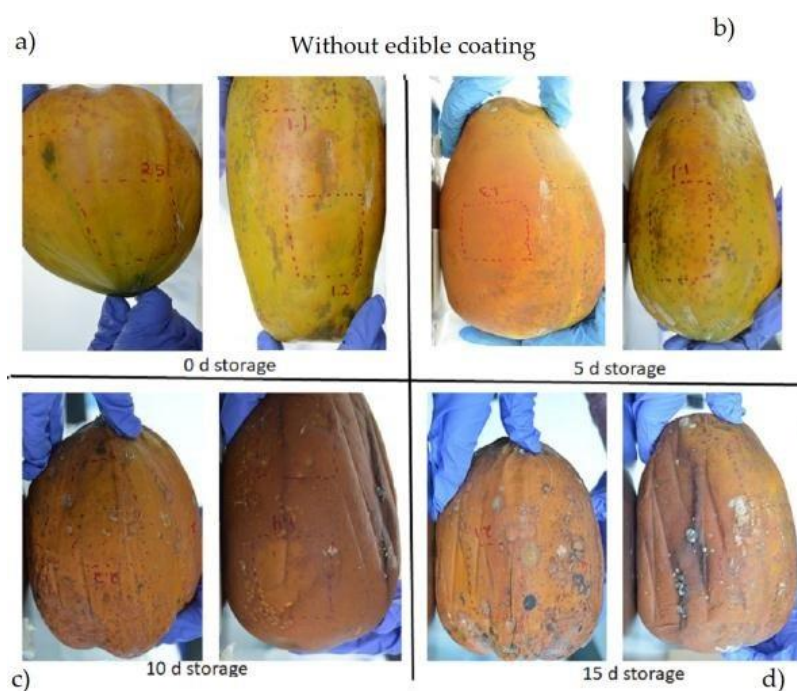

**Figure S1.** Color development during storage of uncoated papaya.

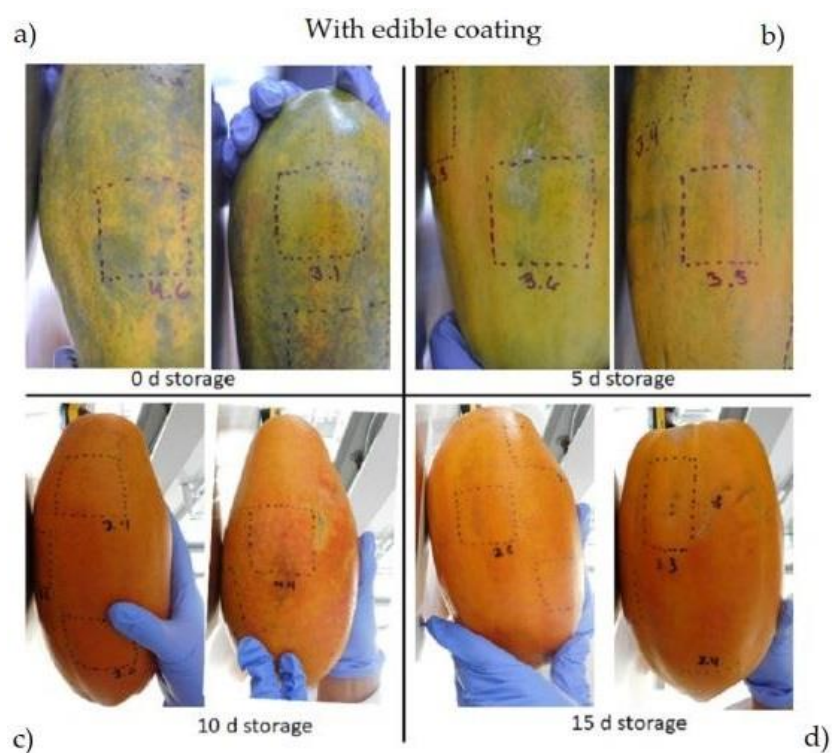

**Figure S2.** Color development during storage of coated papaya.
